# Supplementary material for: RAB7HD/C5orf51 stabilizes newly synthesized RAB7A and facilitates its GTP loading
Source: Research Square preprint supplement (doi:10.21203/rs.3.rs-8547387/v1), 2026-01-22
Supplement: Supplementary file 1 [file 5784c96090d47050acb9f689.docx]

**Table S1 Data collection and refinement statistics**

|  | **RAB7A–C5orf51 (PDB 9X2L)** |
| --- | --- |
| **Data collection** |  |
| Beamline | SPring-8 BL45XU |
| Space group | *P*212121 |
| Cell dimensions |  |
| *a*, *b*, *c* (Å) | 82.2, 84.4, 99.7 |
| *α*, *β*, *γ* (°) | 90.0, 90.0, 90.0 |
| Resolution (Å) | 50.00–3.36 (3.56–3.36) |
| *R*sym | 1.032 (3.649) |
| *I*/*σ*  *CC* (1/2) | 4.83 (1.17)  97.6 (51.7) |
| Completeness (%) | 99.8 (99.2) |
| Redundancy | 25.3 (23.4) |
| **Refinement** |  |
| Resolution (Å) | 3.36 |
| No. reflections | 10,366 |
| *R*work / *R*free | 0.218 / 0.261 |
| No. atoms |  |
| Protein | 3,455 |
| Ligand/Ion | 38 |
| Water | 34 |
| *B* factors (Å2) |  |
| Protein | 77.62 |
| Ligand/Ion | 77.13 |
| Water | 56.60 |
| R.m.s. deviations |  |
| Bond lengths (Å) | 0.010 |
| Bond angles (°)  Ramachandran plot  Favored (%)  Outliers (%) | 1.29  91.8  0 |

Data were collected from a single crystal. Highest-resolution shell is in parentheses.
