# Supplementary material for: RAB7HD/C5orf51 stabilizes newly synthesized RAB7A and facilitates its GTP loading
Source: Research Square preprint supplement (doi:10.21203/rs.3.rs-8547387/v1), 2026-01-22
Supplement: Supplementary file 2 [file 7302fd8ea9c5b93f287d5a49.xlsx]

## Sheet: Sheet1
Table S4
Antibodies	SOURCE	IDENTIFIER
For immunobloting
Rabbit polyclonal anti-C5orf51	This study	AP#2
Rabbit polyclonal anti-DDDDK-tag pAb	MBL	Cat. # PM020, RRID:AB_591224
Mouse monoclonal anti-RABIF (D-12)	Santa Cruz Biotechnologies	Cat. # sc-390759, RRID:AB_2756826
Mouse monoclonal anti-DDDDK (FLA-1)	MBL	Cat. # M185-3L, RRID:AB_11123930
Mouse monoclonal anti-HA-tag mAb (TANA2)	MBL	Cat. # M180-3, RRID:AB_10951811
Rabbit polyclonal anti-TOMM20	Proteintech	Cat. # 11802-1-AP, RRID:AB_2207530
Rabbit monoclonal anti-Rab7 (D95F2) XP	Cell Signaling Technology	Cat. # 9367S, RRID:AB_1904103
Rabbit polyclonal anti-RAB7A	Proteintech	Cat. # 55469-1-AP, RRID:AB_11182831
Mouse monoclonal anti-CCZ1 (B-7)	Santa Cruz Biotechnologies	Cat. # sc-514290, RRID:AB_3714863
Mouse monoclonal anti-β-Actin (6D1)	MBL	Cat. # M177-3, RRID:AB_10697039
Mouse monoclonal anti-HaloTag	Promega	Cat. # G9211, RRID:AB_2688011
Mouse monoclonal anti-GST (B-14)	Santa Cruz Biotechnologies	Cat. # sc-138, RRID:AB_627677
Rabbit polyclonal anti-GST Tag	Proteintech	Cat. # 10000-0-AP, RRID:AB_11042316
For immunostaining
Rat monoclonal anti-HA (3F10)	Roche	Cat. # 11867423001, RRID:AB_390918
Mouse monoclonal anti-DDDDK (FLA-1)	MBL	Cat. # M185-3L, RRID:AB_11123930
Mouse monoclonal anti-LAMP2 (H4B4)	Santa Cruz Biotechnologies	Cat. # sc-18822, RRID:AB_626858
Goat anti-Mouse IgG Alexa Fluor 568 conjugated	Invitrogen	Cat. # A-11031, RRID:AB_144696
Goat anti-Mouse IgG Alexa Fluor 647 conjugated	Invitrogen	Cat. # A-21236, RRID:AB_2535805
Goat anti-Rat IgG Alexa Fluor 568 conjugated	Invitrogen	Cat. # A-11077, RRID:AB_2534121
