# Supplementary material for: RAB7HD/C5orf51 stabilizes newly synthesized RAB7A and facilitates its GTP loading
Source: Research Square preprint supplement (doi:10.21203/rs.3.rs-8547387/v1), 2026-01-22
Supplement: Supplementary file 3 [file 848a7239725dd6f367a031cd.xlsx]

## Sheet: Sheet1
Table S3
Cell lines	SOURCE	IDENTIFIER
WT HeLa	ATCC	CCL-2,2
C5orf51 KO HeLa #2-43	This study
C5orf51 KO HeLa #3-2	This study
HCT116	(Yamano et al., 2018)
C5orf51-/- HCT116 #10	This study
C5orf51-/- HCT116 #17	This study
RAB9A_RAB9B DKO HeLa	This study
C5orf51_RAB9A_RAB9B TKO HeLa	This study
HEK293T	ATCC	CRL-3216
