# Supplementary material for: RAB7HD/C5orf51 stabilizes newly synthesized RAB7A and facilitates its GTP loading
Source: Research Square preprint supplement (doi:10.21203/rs.3.rs-8547387/v1), 2026-01-22
Supplement: Supplementary file 4 [file a93f57a42209aca4ed377088.docx]

**RAB7HD/C5orf51 stabilizes newly synthesized RAB7A and facilitates its GTP loading.**

**Supplemental Figure Legends**

**Figure S1**

**Evolutionary profiles of C5orf51**

The organisms having orthologs of C5orf51 are shown by brown-colored boxes with the phylogenetic dendrogram. LECA, last eukaryotic common ancestor.

**Figure S2**

**Residues 1-176 aa in RAB7A is sufficient for the interaction with C5orf51.**

Different lengths of RAB7A (T22N) with an HA-Ash tag were expressed with hAG-C5orf51 in HeLa cells the cells were immunostained. Bars, 10 mm.

**Figure S3**

**Lysosomal acidification in *C5orf51* KO HeLa cells**

(**A**) WT and *C5orf51* KO (clones #2-43 and #3-2) HeLa cells were treated with LysoTracker Green DND-26. For a control, WT cells were treated with bafilomycin A1 (baf) for 2 hrs. Bars, 50 mm.

(**B**) Fluorescent intensities of LysoTracker in (A) were quantified. Each dot represents an average fluorescent intensity per cells in a microscopic image containing 10-30 cells. The data is shown as a box plot, with the box indicating the inter-quarter range (IQR), the whiskers showing the range of values that are within 1.5 × IQR and a horizontal line indicating the median.

**Figure S4**

**C5orf51 enhances thermal stability of the nucleotide-free RAB7A.**

(**A**) Thermal shift denaturation curves of -d(representative relative fluorescence unit [RFU])/dT and the melting temperatures (Tm) are shown for the indicated proteins.

(**B, C**) Recombinant GST (B) or GST-RAB7A1-176 T22N (C) were incubated at 40-64°C (fractions #1- #8) for 5 min in the absence or presence of C5orf51. The proteins (Sup and Ppt) were separated by centrifugation and analyzed by SDS-PAGE followed by CBB staining. Data shown are representative of two experiments. The protein recovered in Sup fractions was quantified and shown in the graph below. Total (sup + ppt in each fraction) was set to 100. Error bars represent mean ± s.d. of three independent experiments.

(**D, E, F**) Recombinant GST-RAB7A1-176 T22N (D), GppNHp-loaded GST-RAB7A1-176 (E) and apo form of GST-RAB7A1-176 (F) were incubated at 43-56°C (fractions #1- #8) for 5 min in the absence or presence of C5orf51. The samples were prepared, and protein amounts were quantified as in (B). Error bars represent mean ± s.d. of three independent experiments.

**Figure S5**

**C5orf51 functions as a chaperone for RAB7A.**

(**A**) The indicated RAB7A1-176-HA were expressed with or without C5orf51 in *E.coli* BL21(DE3) cells at 32°C or 37°C for 5 hrs. The cells were sonicated, and soluble (S) and insoluble (P) fractions were separated by centrifugation. Total proteins were analyzed by SDS-PAGE followed by CBB staining, and RAB7A-HA and C5orf51 were analyzed by immunoblotting (IB).

(**B**) RAB7A recovered in the supernatant (sup) in (A) were quantified. Total (S+P) amounts were set to 100. Error bars represent mean ± s.d. of three independent experiments.

(**C**) The full-length of RAB7A was used as in (A).

(**D**) RAB7A recovered in the supernatant (sup) in (C) were quantified as in (B).

(**E**) RAB7A1-176-HA was expressed with or without *Danio rerio* (Zf) C5orf51 in *E.coli* BL21(DE3) cells at 32°C or 37°C for 3 hrs. The samples were prepared as in (A).

**Figure S6**

**Sample preparation for crystal of the C5orf51­–RAB7A complex.**

(**A**) Purified recombinant C5orf51 and RAB7A and the mixture were analyzed by SDS-PAGE followed by CBB staining.

(**B, C**) Gel-filtration chromatography profile of C5orf51 and RAB7A mixture. Fractions indicated by the black arrow in (B) were analyzed by SDS-PAGE and CBB staining (C). Fractions indicated by the black box were used for crystallization.

(**D**) RAB7A-C5orf51 crystals appeared upon concentration of fractions (fraction number 40–45). Bar, 50 mm.

**Figure S7**

**Structural comparison of C5orf51 and other TPR-containing proteins.**

(**A**)Summary of structural homologs of C5orf51 identified by the Dali Server. RMSD indicates root mean square deviation (Å2).

(**B**) Structural superposition of C5orf51 (cyan) with representative TPR-containing proteins (gray): LNG (PDB: 5A6C), CNS1 (PDB: 6HFT), and TONSOKU (PDB: 7T7T). The upper and lower panels show the side view, and the top view, respectively.

(**C**) Structural superposition of C5orf51 (cyan) with LNG (gray, PDB: 5A6C). The two insertions (1 and 2) in C5orf51 are highlighted in red. The upper panel shows the side view. The lower panel rotated by 120°.

(**D, E**)TPR structures and their interacting protein are shown in gray and blue, respectively. D, the LNG-Afadin complex (PDB: 5A6C); E, the TONSOKU-histone H3.1 N-terminal region complex (PDB: 7T7T).

**Figure S8**

**Evolutionary conservation mapped on the molecular surface of C5orf51.**

Evolutionary conservation scores are mapped onto the molecular surface of C5orf51. The color scheme was generated using the ConSurf server 1 based on an alignment of sequences from *Homo sapiens, Macaca mulatta, Pan troglodytes, Mus musculus, Canis lupus, Bos taurus, Gallus gallus, Danio rerio*. The amino acids are colored by their conservation degree according to the color-coding bar, from the conserved (dark purple) to the variable (dark cyan). The structure is shown in two different orientations (**A**): concave surface in the left panel and convex surface in the right panel.The structure of C5orf51 is shown as surface representation, and the bound RAB7A is shown as green cartoon representation (**B**).

**Figure S9**

**Structural comparison of the RAB7A–C5orf51 complex with the RAB8–RABIF/MSS4 complex.**

(**A**) The RAB8-RABIF/MSS4 complex (PDB: 2FU5) is shown as cartoon model. RAB8A and RABIF/MSS4 are colored gold and blue, respectively.

**(B)** Structural superposition of the RAB7A in complex with C5orf51 and the RAB8A in complex with RABIF/MSS4. RAB8A and RAB7A are colored gold and green, respectively.

(**C**) Structure of C5orf51.

(**D**) Structure of MSS4.

(**E**) The alignment of amino acid sequence of RAB7A and RAB8A. The coloring scheme of subdomain of RAB7A is as follows: phosphate-binding loop (P-loop), purple; a1 helix, red; Switch I, orange. Underline indicates C5orf51-binding region or RABIF/MSS4-binding region.

**Figure S10**

**Surface hydrophobicity distribution on the C5orf51 structure**

The C5orf51 structure is colored according to its surface hydrophobicity. The color scheme was generated using the color_h 2 script in PyMOL, based on the hydrophobicity scale of each amino acid. The amino acids are colored by their hydrophobicity, ranging from the most hydrophobic (red) to the least hydrophobic (white). RAB7A is shown in green in (**A**). Three hydrophobic pockets (1, 2, and 3) at the interface between C5orf51 and RAB7A were shown in (**B**).

**Figure S11**

**Molecular dynamics simulations for C5orf51-RAB7A complex**

(**A**) Representative snapshots from the MD trajectories with the guanine moiety of GTP located inside (left panel) or protruding outside (right panel) of the guanine recognition motifs. Structures of C5orf51 and RAB7A are depicted in cartoon and surface representations, respectively. The RAB7A motifs are colored in the same manner as in Fig. 6D-H, with the G4-5 regions (guanine recognition motifs) are colored cyan and blue, respectively.

(**B**) Area plot representing a-helix region of RAB7A in the apo (shaded in black) and GTP-bound (shaded in red) forms over the 1 ms MD trajectories.

**Figure S12**

**Overlap between the C5orf51 and MON1–CCZ1 binding sites on RAB7A.**

(**A**)Crystal structure of the C5orf51-RAB7A complex. C5orf51 and RAB7A are shown in cyan and green, respectively.

(**B**)Crystal structure of the MON1-CCZ1 complex bound to Ypt7 (yeast RAB7A homolog) (PDB: 5LDD). Mon1, Ccz1, and Ypt7 are shown in pink, orange, and light green, respectively.

(**C**)Overlay of the C5orf51-RAB7A complex and the Mon1-Ccz1-Ypt7 complex. Close-up views highlight the overlapping binding site on RAB7A/Ypt7 where C5orf51 and MON1-CCZ1 compete for the same interface.

**References**

1. Ashkenazy, H., Abadi, S., Martz, E., Chay, O., Mayrose, I., Pupko, T., and Ben-Tal, N. (2016). ConSurf 2016: an improved methodology to estimate and visualize evolutionary conservation in macromolecules. Nucleic Acids Res *44*, W344–350. 10.1093/nar/gkw408.

2. Eisenberg, D., Schwarz, E., Komaromy, M., and Wall, R. (1984). Analysis of membrane and surface protein sequences with the hydrophobic moment plot. J Mol Biol *179*, 125–142. 10.1016/0022-2836(84)90309-7.
