# Supplementary material for: RAB7HD/C5orf51 stabilizes newly synthesized RAB7A and facilitates its GTP loading
Source: Research Square preprint supplement (doi:10.21203/rs.3.rs-8547387/v1), 2026-01-22
Supplement: Supplementary file 5 [file bb5d7cd7a5356e0190d22e88.docx]

**Table S7**

Conditions of the MD simulations used for energy minimization, equilibration, and production runs. Positional constraints were imposed on the non-hydrogen atoms of the protein molecules, GTP, and Mg2+, with the force gradually decreasing (from 2,000 to 1000, 500, 250, and 0 kJ mol-1 nm-1).

| Process | Steps | Time Step / fs | Temperature / K | Constraints / kJ mol-1 nm-1 |
| --- | --- | --- | --- | --- |
| Energy Minimization | 30,000 | --- | --- | 2,000 → 0 |
| Annealing Temperature | 100,000 | 2 | 0 → 300 | 0 |
| NVT Equilibration | 200,000 | 2 | 300 | 2,000 → 0 |
| NPT Equilibration | 500,000 | 2 | 300 | 0 |
| Production Run | 500,000,000 | 2 | 300 | 0 |
