# Supplementary material for: RAB7HD/C5orf51 stabilizes newly synthesized RAB7A and facilitates its GTP loading
Source: Research Square preprint supplement (doi:10.21203/rs.3.rs-8547387/v1), 2026-01-22
Supplement: Supplementary file 6 [file cf0633ac58378ee5f00b4eab.xlsx]

## Sheet: Sheet1
Table S6
REAGENT	SOURCE	IDENTIFIER
DMEM	Gibco	Cat. # C11965500CP
McCoy’s 5A	Gibco	Cat. # 16600-082
FBS	Nichirei	Cat. # 175012
MEM Non-Essential Amino Acids Solution	Gibco	Cat. # 11140-050
Sodium Pyruvate	Gibco	Cat. # 11360-070
Penicilin-Streptomycin-Glutamine	Gibco	Cat. # 10378-016
GlutaMAX Supplement	Gibco	Cat. # 35050-061
Trypsin-EDTA (0.25%)	Gibco	Cat. # 25200-056
FuGENE 6	Promega	Cat. # E2691
FuGENE HD	Promega	Cat. # E2311
Opti-MEM reduced serum medium	Gibco	Cat. # 31985-070
HEPES	Gibco	Cat. #15630-080
polybrene	Sigma-Aldrich	Cat. # H9268
G418 disulfate salt	Sigma	Cat. # G8168
hygromycin B	Invitrogen	Cat. # 10687-010
Microprep Kit Quick-gDNA	Zymo Research	Cat. # D3021
4% PFA Solution	Wako	Cat. # 163-20145
Triton X-100	nacalai tesque	Cat. # 12967-45
Gelatin	DIFCO	Cat. # 0143-15-1
Tween 20	nacalai tesque	Cat. # 35624-15
DAPI	Invitrogen	Cat. # D1306
cOmplete, EDTA-free Protease Inhibitor Cocktail	Roche	Cat. # 11873580001
CHAPS	Sigma-Aldrich	Cat. # C3023
sodium deoxycholate	Sigma-Aldrich	Cat. # D6750
BL21-CodonPlus(DE3)-RIL Competent Cells	Agilent Technology	Cat. # 230245
Rosetta (DE3)	Novagen	Cat. # 70954
β-mercaptoethanol	nacalai tesque	Cat. # 21438-82
LB Broth, Lennox	nacalai tesque	Cat. # 20066-24
lysozyme	Wako	Cat. # 122-02673
DNaseI	Worthington Biochemical Corporation	Cat. # 26P9235
DTT (1,4-dithiothreitol)	Roche	Cat. # 10708984001
Ni-NTA agarose	QIAGEN	Cat. # 30230
TCEP (Tris(2-carboxyethyl)phosphine hydrochloride	Sigma	Cat. # C4706-10G
Amicon-Ultra-15	Millipore	Cat. # UFC901024
Chaperone competent cells pGro7/BL21	TaKaRa	Cat. # 9122
L-(+)-arabinose	Sigma	Cat. # A3256
Glutathione Sepharose 4B	cytiva	Cat. # 17075605
PD MidiTrap™ G-25	cytiva	Cat. # 28918008
L-Glutathione reduced	Sigma	Cat. # G4251-25G
Imidazole	FUJIFILM	Cat. # 095-00015
GppNHp	Sigma	Cat. # G0635
GDP	Sigma	Cat. # G7127
PUREfrex®1.0	GeneFronter	Cat. # PF001
NuPAGE 4-12% Bis-Tris gel	Invitrogen	Cat. # NP0323BOX
Difco Skim Milk	BD Biosciences	Cat. # 232100
Phusion High-Fidelity DNA polymerase	New England Biolabs	Cat. # M530L
DNA Ligation Kit	TaKaRa	Cat. # 6023
Western Lightning Plus-ECL	Revvity	Cat. # NEL105001EA
ECL Prime Western Blotting Detection Reagents	cytiva	Cat. # RPN2232
anti-FLAG M2 magnetic beads	Sigma	Cat. # M8823
Protein Thermal Shift Dye	Thermo Fisher Scientific	Cat. # 4461146
Isopropyl b-D-1-thiogalactopyranoside (IPTG)	Wako	Cat. # 097-05014
Bafilomycin A1	Adipogen Life Sciences	Cat. # BVT-0252-M001
DDDDK-tagged Protein PURIFICATION GEL	MBL	Cat. # 3328R
Starvation DMEM	FUJIFILM	Cat. # 048-33575
TMR-conjugated Halo ligand	Promega	Cat. # G8251
Trypsin/Lys-C Mix, Mass Spec Grade	Promega	Cat. # V5072
trifluoroacetic acid (TFA)	Wako	Cat. # 206-10731
GL-Tip SDB	GL Sciences	Cat. # 7820-11200
HPLC capillary column	Nikkyo Technos	Cat. # 75-3-155
LysoTracker Green DND-26	Thermo Fisher Scientific	Cat. # L7526
