# Supplementary material for: RAB7HD/C5orf51 stabilizes newly synthesized RAB7A and facilitates its GTP loading
Source: Research Square preprint supplement (doi:10.21203/rs.3.rs-8547387/v1), 2026-01-22
Supplement: Supplementary file 7 [file d3f604ca5a0b68f6b13a7404.xlsx]

## Sheet: Sheet1
Table S5
Plasmid DNA	SOURCE
pUMVC (Gag-Pol)	Gift from Chunxin Wang
pCMV-VSV-G (VSV-G)	Gift from Chunxin Wang
pTOPO_C5orf51	This study
pTOPO_C18orf8 (RMC1)	This study
phAG-C5orf51	This study
pHA-Ash-RAB7A-delC	This study
pHA-Ash-RAB7A(Q67L)-delC	This study
pHA-Ash-RAB7A(T22N)-delC	This study
pHA-Ash-Rab7(N125I)-delC	This study
pHA-Ash-RAB1A-delC	This study
pHA-Ash-RAB1A(Q70L)-delC	This study
pHA-Ash-RAB1A(S25N)-delC	This study
pHA-Ash-RAB1A(N124I)-delC	This study
phAG-MON1B	This study
pHA-Ash-CCZ1	This study
pHA-Ash vector	Yamano et al. JCB 2020
pHA-Ash-MON1B	This study
pcDNA3.1(+)_3FLAG-TEV-CCZ1	This study
phAG-RMC1	This study
pGFP-CCZ1	Yamano et al. Elife 2018
pGFP-MON1B	Yamano et al. Elife 2018
pcDNA3.1(+)_3FLAG-TEV-Rab7A WT	This study
pcDNA3.1(+)_3FLAG-TEV-Rab7A(Q67L)	This study
pcDNA3.1(+)_3FLAG-TEV-Rab7A(T22N)	This study
pcDNA3.1(+)_3FLAG-TEV-Rab7A(N125I)	This study
pTOPO_RAB4A	This study
pcDNA3.1(+)_3FLAG-TEV-Rab4A WT	This study
pcDNA3.1(+)_3FLAG-TEV-Rab4A(N126I)	This study
pTOPO_RAB6A v1	This study
pcDNA3.1(+)_3FLAG-TEV-Rab6A v1 WT	This study
pcDNA3.1(+)_3FLAG-TEV-Rab6A v1(N126I)	This study
pTOPO_Rab8A	This study
pcDNA3.1(+)_3FLAG-TEV-RAB8A WT	This study
pcDNA3.1(+)_3FLAG-TEV-RAB8A(N121I)	This study
pEGFP-C1-Rab9A-S21N (mouse)	RIKEN BRC Cat # RDB16879
pcDNA3.1(+)_3FLAG-TEV-mRab9A WT	This study
pcDNA3.1(+)_3FLAG-TEV-mRab9A(N126I)	This study
pTOPO_Rab11A	This study
pcDNA3.1(+)_3FLAG-TEV-Rab11A WT	This study
pcDNA3.1(+)_3FLAG-TEV-Rab11A(N124I)	This study
pTOPO_RAB18	This study
pcDNA3.1(+)_3FLAG-TEV-RAB18 WT	This study
pcDNA3.1(+)_3FLAG-TEV-RAB18(N122I)	This study
pTOPO_RAB1A	This study
pcDNA3.1(+)_3HA-TEV-MON1B	This study
pcDNA3.1(+)_3HA-TEV-CCZ1	This study
pcDNA3.1(+)_3HA-TEV-C5orf51	This study
pcDNA3.1(+)_3FLAG-TEV vector	Yamano et al. JCB 2020
pcDNA3.1(+)_3FLAG-TEV-C5orf51	This study
pcDNA3.1(+)_3FLAG-TEV-RMC1	This study
pACT2	TaKaRa Bio Cat # 638822
pGBD-C1-Rab1-43(GTP-locked or Apo)-DCys	RIKEN BRC Cat # 18802-18925
pAct2-C5orf51	This study
pHA-Ash-mRab9A(S21N)-delC	This study
pHA-Ash-mRab9B(S21N)-delC	This study
pHA-Ash-mRab23(S23N)-delC	This study
pEGFP-C1-Rab9B	RIKEN BRC Cat # RDB17256
pEGFP-C1-Rab23	RIKEN BRC Cat # RDB17269
pEGFP-C1-Rab32 T37N	RIKEN BRC Cat # RDB16890
pEGFP-C1-Rab38 T23N	RIKEN BRC Cat # RDB16899
pHA-Ash-mRab32(T37N)-delC	This study
pHA-Ash-mRab38(T23N)-delC	This study
pBABE-puro_3FLAG-TEV-C5orf51	This study
pC5orf51-mCherry	This study
PX459 vector	Addgene # 62988
PX459-C5orf51-ex1-1	This study
PX459-C5orf51-ex1-2	This study
PX459-C5orf51-ex1-3	This study
pEX-A2J2-C5orf51-donor	This study (Eurofin)
pEX-A2J2-C5orf51-NeoR-donor	This study
pEX-A2J2-C5orf51-HygroR-donor	This study
NeoR vector (pMK286)	Natsume et al. Cell Rep 2016
HygroR vector (pMK287)	Natsume et al. Cell Rep 2016
pEX-A2J2_Opt_C5orf51	This study (Eurofin)
pEX-A2J2_Opt_Rab7A 1-203aa	This study (Eurofin)
pET21a_T7-C5orf51-His6	This study
pET21a_T7-Opt_C5orf51-His6	This study
pET21a_Opt_RAB7A (1-176aa)-His6	This study
pET16b_His10-C5orf51	This study
pGEX6P1 vector	Cytiva Cat # 28954648
pGEX6P1_GST-C5orf51	This study
pGEX6P1_GST-Opt_C5orf51	This study
pGEX6P1_GST-Opt_Rab7A (1-176aa)	This study
pGEX6P1_GST-Opt_Rab7A (1-176aa, Q67L)	This study
pGEX6P1_GST-Opt_Rab7A (1-176aa, T22N)	This study
pGEX6P1_GST-Opt_Rab7A (1-176aa, N125I)	This study
pETDuet-1_MCS1 & Opt_C5orf51	This study
pETDuet-1_His-Opt_RAB7A(1-176aa, WT)-HA & Opt_C5orf51	This study
pETDuet-1_His-Opt_RAB7A(1-176aa, Q67L)-HA & Opt_C5orf51	This study
pETDuet-1_His-Opt_RAB7A(1-176aa, T22N)-HA & Opt_C5orf51	This study
pETDuet-1_His-Opt_RAB7A(1-176aa, N125I)-HA & Opt_C5orf51	This study
pETDuet-1_His-RAB1A(1-176aa, WT) & MCS2	This study
pETDuet-1_His-RAB1A(1-176aa, WT) & Opt_C5orf51	This study
pETDuet-1_His-RAB1B(1-173aa, WT) & MCS2	This study
pETDuet-1_His-RAB1B(1-173aa, WT) & Opt_C5orf51	This study
pETDuet-1_His-Opt_RAB8A(1-176aa, WT) & MCS2	This study
pETDuet-1_His-Opt_RAB8A(1-176aa, WT) & Opt_C5orf51	This study
pETDuet-1_His-Opt_RAB8B(1-176aa, WT) & MCS2	This study
pETDuet-1_His-Opt_RAB8B(1-176aa, WT) & Opt_C5orf51	This study
pETDuet-1_His-Opt_RAB10(1-174aa, WT) & MCS2	This study
pETDuet-1_His-Opt_RAB10(1-174aa, WT) & Opt_C5orf51	This study
pETDuet-1_Opt_RAB7A(1-176, WT)-HA & Opt_C5orf51-His	This study
pETDuet-1_Opt_RAB7A(1-176, T22N)-HA & Opt_C5orf51-His	This study
pETDuet-1_His-Opt_RAB7A(1-176aa, WT) & MCS2	This study
pETDuet-1_His-Opt_RAB7A(1-176aa, WT) & Opt_C5orf51	This study
pEX-A2J2_Opt_ZfC5orf51	This study (Eurofin)
pETDuet-1_His-Opt_RAB7A(1-176aa, WT) & Opt_ZfC5orf51	This study
pETDuet-1_His-Opt_RAB7A(1-176aa, T22N) & Opt_ZfC5orf51	This study
pETDuet-1_Opt_RAB7A(full, WT) & MCS2	This study
pETDuet-1_Opt_RAB7A(full, WT) & Opt_C5orf51	This study
pcDNA3.1(+) vector	Invitrogen Cat. # V79020
phAG-C5orf51(Y76A)	This study
phAG-C5orf51(Y76S)	This study
phAG-C5orf51(C130A)	This study
phAG-C5orf51(C130W)	This study
phAG-C5orf51(Y140A)	This study
phAG-C5orf51(M141A)	This study
phAG-C5orf51(M141S)	This study
phAG-C5orf51(I181A)	This study
phAG-C5orf51(V187A)	This study
phAG-C5orf51(F189A)	This study
phAG-C5orf51(L197A)	This study
phAG-C5orf51(L198A)	This study
phAG-C5orf51(Δ181-199)	This study
phAG-C5orf51(D205A)	This study
phAG-C5orf51(L208A)	This study
phAG-C5orf51(L209A)	This study
phAG-C5orf51(M212A)	This study
phAG-C5orf51(M212S)	This study
phAG-C5orf51(Y213A)	This study
phAG-C5orf51(L272A)	This study
phAG-C5orf51(L272N)	This study
phAG-C5orf51(E274A)	This study
phAG-C5orf51(W277A)	This study
pET21a_T7-Opt_C5orf51(Y76S)-His6	This study
pET21a_T7-Opt_C5orf51(C130W)-His6	This study
pET21a_T7-Opt_C5orf51(L209A)-His6	This study
pET21a_T7-Opt_C5orf51(M212S)-His6	This study
pET21a_T7-Opt_C5orf51(Y213A)-His6	This study
pET21a_T7-Opt_C5orf51(W277A)-His6	This study
pGEX6P1_GST-Opt_Rab7A (1-176aa, L8A)	This study
pGEX6P1_GST-Opt_Rab7A (1-176aa, M25A)	This study
pGEX6P1_GST-Opt_Rab7A (1-176aa, Y28A)	This study
pGEX6P1_GST-Opt_Rab7A (1-176aa, V29A)	This study
pGEX6P1_GST-Opt_Rab7A (1-176aa, F33A)	This study
pGEX6P1_GST-Opt_Rab7A (1-176aa, Y37A)	This study
pGEX6P1_GST-Opt_Rab7A (1-176aa, F45A)	This study
pGEX6P1_GST-Opt_Rab7A (1-176aa, T47L)	This study
pGEX6P1_GST-Opt_Rab7A (1-176aa, W62A)	This study
pHA-Ash-RAB7A(T22N, L8A)-delC	This study
pHA-Ash-RAB7A(T22N, M25A)-delC	This study
pHA-Ash-RAB7A(T22N, Y28A)-delC	This study
pHA-Ash-RAB7A(T22N, V29A)-delC	This study
pHA-Ash-RAB7A(T22N, F33A)-delC	This study
pHA-Ash-RAB7A(T22N, Y37A)-delC	This study
pHA-Ash-RAB7A(T22N, F45A)-delC	This study
pHA-Ash-RAB7A(T22N, T47L)-delC	This study
pHA-Ash-RAB7A(T22N, W62A)-delC	This study
pHA-Ash-RAB7A(1-38aa, T22N)	This study
pHA-Ash-RAB7A(1-47aa, T22N)	This study
pHA-Ash-RAB8A(T22N)-delC	This study
pHA-Ash-RAB8A(T22N)-7A(25-38aa)-delC	This study
pHA-Ash-mRAB9A(S21N)-delC	This study
pHA-Ash-hRAB9A(S21N)-7A(25-38aa)-delC	This study
pMRX-IBU-HaloTag7-mGFP	Yim et al. Elife 2022
