# Supplementary material for: RAB7HD/C5orf51 stabilizes newly synthesized RAB7A and facilitates its GTP loading
Source: Research Square preprint supplement (doi:10.21203/rs.3.rs-8547387/v1), 2026-01-22
Supplement: Supplementary file 8 [file e4d28a1a90436947af0eec78.docx]

**Table S2**

Frequencies of hydrogen bonds formed between the residues (M25, Y28, and V29) of the RAB7A a1 region and the residues of C5orf51 throughout MD trajectories in the apo and GTP-bound forms.

|  | apo | | GTP-bound | |
| --- | --- | --- | --- | --- |
| RAB7A Residue | C5orf51 Residue | Frequency | C5orf51 Residue | Frequency |
| M25 | W133 | 19 | W133 | 1 |
|  | E126 | 86 |  |  |
| Y28 | R39 | 1,279 | R39 | 64 |
|  | Q69 | 6 | Q69 | 56 |
|  | D73 | 2 | D73 | 40 |
|  | Y76 | 92 | Y76 | 2 |
|  | W133 | 2 | N80 | 2 |
|  |  |  | W133 | 5 |
| V29 | Y6 | 709 | Y76 | 139 |
